# Supplementary material for: The Discrepancy Between Standard Histologic WHO Grading of Meningioma and Molecular Profile: A Single Institution Series
Source: PubMed Central journal article supplement (PMC8921552; doi:10.3389/fonc.2022.846232), 2022-03-01
Supplement: DataSheet_1.pdf [file DataSheet_1.pdf]

## Supplementary Material

### 1 Supplementary Figures

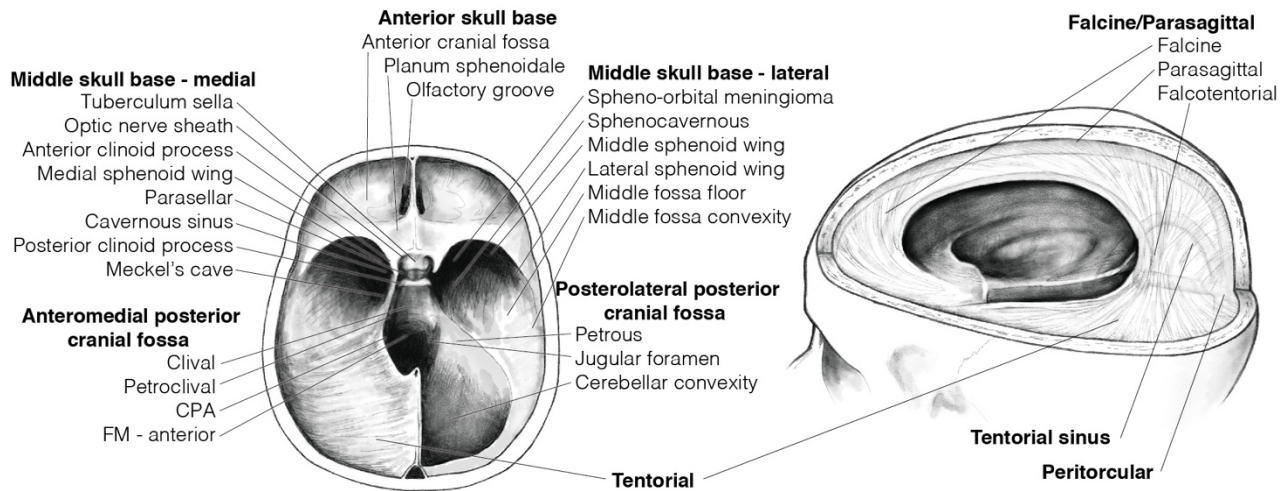

**Supplementary Figure 1.** Superior view of skull base meninges (left) and superolateral view of meninges (right) showing the classification and locations of meningiomas. Locations not depicted in this illustration are anterior convexity meningiomas (convexity anterior to central sulcus, frontotemporal convexity), posterior convexity meningiomas (convexity posterior to central sulcus), intraventricular, and spinal meningiomas. FM = foramen magnum.

## 2 Supplementary Tables

Supplementary Table 1: OU Health meningioma cohort

|                                    | All meningiomas       | WHO Grade 1   | WHO Grade 2  | WHO Grade 3   |
|------------------------------------|-----------------------|---------------|--------------|---------------|
| n (%)                              | 151 (100)             | 129 (85.4)    | 20 (13.3)    | 2 (1.3)       |
| Male n (%)                         | 35 (23)               | 25 (20)       | 9 (45)       | 1 (50)        |
| Female n (%)                       | 116 (77)              | 104 (80)      | 11 (55)      | 1 (50)        |
| Age mean (range)                   | 59 (22-88)            | 59 (22-88)    | 59 (25-74)   | 74 (67-81)    |
| <b>Histology</b>                   |                       |               |              |               |
| I                                  | Meningothelial        | 74 (49)       | 74 (57)      |               |
|                                    | Transitional          | 34 (23)       | 34 (26)      |               |
|                                    | Psammomatous          | 4 (2.6)       | 4 (3.1)      |               |
|                                    | Angiomatous           | 4 (2.6)       | 4 (3.1)      |               |
|                                    | Secretory             | 3 (2.0)       | 3 (2.3)      |               |
|                                    | Fibroblastic          | 3 (2.0)       | 3 (2.3)      |               |
|                                    | Microcystic           | 1 (0.7)       | 1 (0.8)      |               |
|                                    | Lymphoplasmacyte-rich | 0 (0.0)       | 0 (0.0)      |               |
|                                    | Metaplastic           | 0 (0.0)       | 0 (0.0)      |               |
|                                    | >1 histologic subtype | 5* (3.3)      | 5* (3.9)     |               |
|                                    | Undetermined          | 1 (0.7)       | 1 (0.8)      |               |
| II                                 | Atypical              | 17 (11)       |              | 17 (85)       |
|                                    | Chordoid              | 3 (2.0)       |              | 3 (15)        |
|                                    | Clear-cell            | 0 (0.0)       |              | 0 (0.0)       |
| III                                | Papillary             | 1 (0.7)       |              | 1 (50)        |
|                                    | Rhabdoid              | 0 (0.0)       |              | 0 (0.0)       |
|                                    | Anaplastic            | 1 (0.7)       |              | 1 (50)        |
| Max Ki-67/MIB-1 Mean (range)       | 3.7 (0.06-32.0)       | 2.7 (0.06-19) | 8.4 (0.9-32) | 19.5 (8.9-30) |
| <b>NF status</b>                   |                       |               |              |               |
| NF altered n (%)                   | 60 (40)               | 49 (38)       | 10 (50)      | 1 (50)        |
| NF wildtype n (%)                  | 91 (60)               | 80 (62)       | 10 (50)      | 1 (50)        |
| <b>Molecular Profiles included</b> |                       |               |              |               |
| Cytogenetic data                   | 124                   | 106           | 16           | 2             |
| Neuro-oncology panel               | 149                   | 128           | 19           | 2             |

\*These specimens equally exhibited two histologic subtypes. The majority of these were a combination of meningothelial and transitional, psammomatous, or secretory histology.

**Supplementary Table 2: OU Health meningioma cohort**

| Copy number locus | Overall prevalence (n = 124) | Grade 1 – low grade copy no. (n = 75) | Grade 1 – high grade copy no. (n = 31) | Grade 2 – low grade copy no. (n = 4) | Grade 2 – high grade copy no (n = 12) | Grade 3 – high grade copy no (n = 2) |
|-------------------|------------------------------|---------------------------------------|----------------------------------------|--------------------------------------|---------------------------------------|--------------------------------------|
| 1p                | 39 (31%)                     | 1 (1.3%)                              | 24 (77%)                               | 0 (0%)                               | 12 (100%)                             | 2 (100%)                             |
| 3p                | 10 (8.1%)                    | 0 (0%)                                | 6 (19%)                                | 0 (0%)                               | 3 (25%)                               | 1 (50%)                              |
| 4p                | 9 (7.3%)                     | 0 (0%)                                | 6 (19%)                                | 0 (0%)                               | 2 (17%)                               | 1 (50%)                              |
| 4q                | 5 (4.0%)                     | 0 (0%)                                | 1 (3.2%)                               | 0 (0%)                               | 3 (25%)                               | 1 (50%)                              |
| 6p                | 10 (8.1%)                    | 0 (0%)                                | 6 (19%)                                | 0 (0%)                               | 4 (33%)                               | 0 (0%)                               |
| 6q                | 16 (13%)                     | 0 (0%)                                | 8 (26%)                                | 1 (25%)                              | 7 (58%)                               | 0 (0%)                               |
| 10p               | 9 (7.3%)                     | 0 (0%)                                | 4 (13%)                                | 0 (0%)                               | 3 (25%)                               | 2 (100%)                             |
| 10q               | 12 (9.7%)                    | 0 (0%)                                | 6 (19%)                                | 0 (0%)                               | 4 (33%)                               | 2 (100%)                             |
| 14q               | 21 (17%)                     | 0 (0%)                                | 12 (39%)                               | 0 (0%)                               | 8 (67%)                               | 1 (50%)                              |
| 18p               | 8 (6.5%)                     | 0 (0%)                                | 5 (16%)                                | 0 (0%)                               | 2 (17%)                               | 1 (50%)                              |
| 18q               | 13 (11%)                     | 0 (0%)                                | 8 (26%)                                | 0 (0%)                               | 3 (25%)                               | 2 (100%)                             |
| 19p               | 11 (8.9%)                    | 0 (0%)                                | 8 (26%)                                | 0 (0%)                               | 1 (8.3%)                              | 2 (100%)                             |
| 19q               | 5 (4.0%)                     | 0 (0%)                                | 4 (13%)                                | 0 (0%)                               | 0 (0%)                                | 1 (0%)                               |
| 22p               | 53 (43%)                     | 28 (38%)                              | 15 (48%)                               | 1 (25%)                              | 7 (58%)                               | 2 (100%)                             |
| 22q               | 67 (54%)                     | 31 (42%)                              | 22 (71%)                               | 1 (25%)                              | 11 (92%)                              | 2 (100%)                             |
| None              | 35 (28%)                     | 33 (44%)                              | 0 (0%)                                 | 2 (50%)                              | 0 (0%)                                | 0 (0%)                               |
| Other gain/loss   | 59 (48%)                     | 20 (27%)                              | 25 (81%)                               | 0 (0%)                               | 12 (100%)                             | 2 (100%)                             |

**Supplementary Table 3: Molecular profile of meningiomas with identified driver mutations**

| Gene            | Mutation      | Cytogenetic Background | WHO Grade | Co-mutated Genes |                   |               |               |
|-----------------|---------------|------------------------|-----------|------------------|-------------------|---------------|---------------|
|                 |               |                        |           | Gene             | Mutation          | Gene          | Mutation      |
| <i>AKT1</i>     | E17K          | Low grade              | 1         | None             | -                 |               |               |
|                 | E17K          | Low grade              | 1         | None             | -                 |               |               |
|                 | E17K          | Low grade              | 1         | <i>TRAF7</i>     | R641H             |               |               |
|                 | E17K          | Low grade              | 1         | <i>TRAF7</i>     | G536S             |               |               |
|                 | E17K          | Low grade              | 1         | <i>TRAF7</i>     | K615E             |               |               |
|                 | E17K          | Low grade              | 1         | <i>TRAF7</i>     | N520S             |               |               |
|                 | G109S         | Low grade              | 2         | <i>NF2</i>       | W184*             |               |               |
|                 | E17K          | Low grade              | 2         | <i>TRAF7</i>     | N520S             |               |               |
|                 | E17K          | Low grade              | 2         | <i>TRAF7</i>     | P398R             |               |               |
|                 | E17K          | Low grade              | 2         | <i>TRAF7</i>     | R653P             |               |               |
| <i>PIK3CA</i>   | H1047L        | Low grade              | 1         | None             | -                 |               |               |
|                 | V71I          | <b>High grade</b>      | 1         | <i>NF2</i>       | 241-1G>C          |               |               |
|                 | H1047R        | Low grade              | 1         | <i>TERT-alt</i>  | E441del           |               |               |
|                 | E545A         | Low grade              | 1         | <i>TRAF7</i>     | N520S             |               |               |
|                 | N497S         | Low grade              | 1         | <i>TRAF7</i>     | N520S             | <i>KLF4</i>   | K409Q (K443Q) |
|                 | C420R         | Low grade              | 1         | <i>TRAF7</i>     | C388Y             |               |               |
| <i>BAP1</i>     | E491*         | Low grade              | 1         | None             | -                 |               |               |
|                 | G185R         | Low grade              | 2         | <i>POLR2A</i>    | S1562T            |               |               |
| <i>CDKN2A/B</i> | A88T          | <b>High grade</b>      | 1         | <i>NF2</i>       | 241-1_241delinsCT |               |               |
|                 | R101Q         | <b>High grade</b>      | 2         | None             | -                 |               |               |
|                 | E26Gfs*24     | <b>High grade</b>      | 2         | <i>NF2</i>       | F96del            |               |               |
| <i>KLF4</i>     | A122T         | Low grade              | 1         | None             | -                 |               |               |
|                 | K409Q (K443Q) | Low grade              | 1         | <i>TRAF7</i>     | N520S             |               |               |
|                 | K409Q (K443Q) | Low grade              | 1         | <i>TRAF7</i>     | N520S             | <i>PIK3CA</i> | N497S         |
|                 | K409Q (K443Q) | Low grade              | 1         | <i>TRAF7</i>     | K615E             |               |               |
|                 | K409Q (K443Q) | Low grade              | 1         | <i>TRAF7</i>     | G536S             |               |               |
|                 | K409Q (K443Q) | Low grade              | 1         | <i>TRAF7</i>     | G536S             |               |               |
|                 | K409Q (K443Q) | Low grade              | 1         | <i>TRAF7</i>     | G559R             |               |               |
|                 | K409Q (K443Q) | Low grade              | 1         | <i>TRAF7</i>     | R653Q             |               |               |
|                 | K409Q (K443Q) | Low grade              | 1         | <i>TRAF7</i>     | T391I             |               |               |
| <i>POLR2A</i>   | P1746L        | Low grade              | 1         | None             | -                 |               |               |
|                 | I399K         | Low grade              | 1         | None             | -                 |               |               |
|                 | Q403K         | Low grade              | 1         | None             | -                 |               |               |
|                 | Q403K         | Low grade              | 1         | None             | -                 |               |               |
|                 | Q403K         | Low grade              | 1         | <i>TERT-alt</i>  | E441del           |               |               |

|                             |                      |                   |            |               |                         |               |       |
|-----------------------------|----------------------|-------------------|------------|---------------|-------------------------|---------------|-------|
|                             | S1562T               | Low grade         | 2          | <i>BAP1</i>   | G185R                   |               |       |
| <i>SMARCB1</i>              | L356*                | Low grade         | 1          | <i>NF2</i>    | R341*                   |               |       |
|                             | L356Dfs*4            | Low grade         | 1          | <i>NF2</i>    | E463Rfs*3<br>2          |               |       |
|                             | R377H/R3<br>86H      | Low grade         | 1          | <i>NF2</i>    | E348*                   |               |       |
|                             | R377H/R3<br>86H      | Low grade         | 1          | <i>NF2</i>    | 448-<br>15_448-<br>2del |               |       |
| <i>SMO</i>                  | L412F                | Low grade         | 1          | None          | -                       |               |       |
|                             | L412F                | Low grade         | 1          | None          | -                       |               |       |
|                             | R772C                | Low grade         | 1          | None          | -                       |               |       |
|                             | V54M                 | Low grade         | 1          | <i>NF2</i>    | 1122+1_11<br>22+22del   |               |       |
|                             | P698R                | Low grade         | 1          | <i>NF2</i>    | A388Pfs*3<br>8          |               |       |
|                             | P116S                | <b>High grade</b> | 1          | <i>NF2</i>    | L241Ffs*1<br>0          |               |       |
| <i>TERTp<sup>1</sup></i>    | -.124C>T             | <b>High grade</b> | 1          | None          | -                       |               |       |
|                             | -.124C>T             | <b>High grade</b> | 2          | <i>NF2</i>    | L46R                    |               |       |
| <i>TERT-alt<sup>1</sup></i> | R972C                | Low grade         | 1          | None          | -                       |               |       |
|                             | E441del              | Low grade         | 1          | None          | -                       |               |       |
|                             | E441del              | Low grade         | 1          | None          | -                       |               |       |
|                             | E441del              | Low grade         | 1          | <i>PIK3CA</i> | H1047R                  |               |       |
|                             | E441del              | Low grade         | 1          | <i>POLR2A</i> | Q403K                   |               |       |
| <i>TRAF7</i>                | Q643_G64<br>4delinsR | Low grade         | 1          | None          | -                       |               |       |
|                             | T391A                | Low grade         | 1          | None          | -                       |               |       |
|                             | F354_R356<br>del     | Low grade         | 1          | None          | -                       |               |       |
|                             | N520S                | Low grade         | 1          | None          | -                       |               |       |
|                             | G390E                | Low grade         | 1          | None          | -                       |               |       |
|                             | C431F                | Low grade         | 1          | None          | -                       |               |       |
|                             | G390R                | Low grade         | 1          | None          | -                       |               |       |
|                             | R653Q                | Low grade         | 1          | None          | -                       |               |       |
|                             | R641H                | Low grade         | 1          | <i>Akt1</i>   | E17K                    |               |       |
|                             | G536S                | Low grade         | 1          | <i>Akt1</i>   | E17K                    |               |       |
|                             | K615E                | Low grade         | 1          | <i>Akt1</i>   | E17K                    |               |       |
|                             | N520S                | Low grade         | 1          | <i>Akt1</i>   | E17K                    |               |       |
|                             | N520S                | Low grade         | 1          | <i>KLF4</i>   | K409Q<br>(K443Q)        |               |       |
|                             | K615E                | Low grade         | 1          | <i>KLF4</i>   | K409Q<br>(K443Q)        |               |       |
|                             | G536S                | Low grade         | 1          | <i>KLF4</i>   | K409Q<br>(K443Q)        |               |       |
|                             | R653Q                | Low grade         | 1          | <i>KLF4</i>   | K409Q<br>(K443Q)        |               |       |
|                             | T391I                | Low grade         | 1          | <i>KLF4</i>   | K409Q<br>(K443Q)        |               |       |
|                             | G536S                | Low grade         | 1          | <i>KLF4</i>   | K409Q<br>(K443Q)        |               |       |
|                             | G559R                | Low grade         | 1          | <i>KLF4</i>   | K409Q<br>(K443Q)        |               |       |
|                             | N520S                | Low grade         | 1          | <i>KLF4</i>   | K409Q<br>(K443Q)        | <i>PIK3CA</i> | N497S |
| G437S                       | Low grade            | 1                 | <i>NF2</i> | W191*         |                         |               |       |

|  |       |                   |   |               |       |  |  |
|--|-------|-------------------|---|---------------|-------|--|--|
|  | C388Y | Low grade         | 1 | <i>PIK3CA</i> | C420R |  |  |
|  | N520S | Low grade         | 1 | <i>PIK3CA</i> | E545A |  |  |
|  | R641H | <b>High grade</b> | 2 | None          | -     |  |  |
|  | N520S | Low grade         | 2 | <i>Akt1</i>   | E17K  |  |  |
|  | P398R | Low grade         | 2 | <i>Akt1</i>   | E17K  |  |  |
|  | R653P | Low grade         | 2 | <i>Akt1</i>   | E17K  |  |  |
|  | K615E | Low grade         | 2 | <i>Akt1</i>   | E17K  |  |  |

<sup>1</sup>*TERT<sub>p</sub>* denotes alterations within the *TERT* promoter, while *TERT-alt* refers to mutations not within the promoter region.
